# Supplementary material for: Habitual Sleep Duration and Risk of Childhood Obesity: Systematic Review and Dose-response Meta-analysis of Prospective Cohort Studies
Source: PubMed Central journal article supplement (PMC4633618; doi:10.1038/srep16160), 2015-11-05
Supplement: srep16160-s1.pdf [file srep16160-s1.pdf]

# **Habitual Sleep Duration and Risk of Childhood Obesity: Systematic Review and Dose-response**

## **Meta-analysis of Prospective Cohort Studies**

Huijuan Ruan<sup>1†</sup>, Pengcheng Xun<sup>2†</sup>, Wei Cai<sup>1,3,4</sup>, Ka He<sup>2\*</sup> and Qingya Tang<sup>1\*</sup>

<sup>1</sup>Department of Clinical Nutrition, Xin Hua Hospital, School of Medicine, Shanghai Jiao Tong University, Shanghai, China;

<sup>2</sup>Department of Epidemiology and Biostatistics, School of Public Health-Bloomington, Indiana University, Bloomington, IN, USA;

<sup>3</sup>Shanghai Key Laboratory of Pediatric Gastroenterology and Nutrition, Shanghai, China; Shanghai Institute of Pediatric Research, Shanghai, China;

<sup>4</sup>Department of Pediatric Surgery, Xin Hua Hospital, School of Medicine, Shanghai Jiao Tong University, Shanghai, China.

†These authors contribute equally to this work.

### **\*Corresponding authors:**

Dr. Qingya Tang; Address: No. 1665, Kongjiang Rd, Shanghai, China; Phone: +86-21-25078670; Fax: +86-21-25078972; E-mail: tangqingya@163.com

Dr. Ka He; Address: Department of Epidemiology and Biostatistics, School of Public Health-Bloomington, Indiana University, 1025 E. Seventh Street, C034, Bloomington, Indiana 47405, USA; Phone: 812-856-2260; Fax: 812-855-7345; E-mail: kahe@indiana.edu

**Supplemental Table** Influence of single study on the association between sleep duration and risk of overweight/obesity or annual BMI gain

| <b>Outcome</b>          | <b>Comparison</b>                | <b>Cohort omitted</b>            | <b>OR (95% CI)</b>                |
|-------------------------|----------------------------------|----------------------------------|-----------------------------------|
| Overweight/obesity      | Lowest vs. highest               | None                             | <b>1.76(1.39, 2.23)</b>           |
|                         |                                  | Reilly, 2005                     | 1.83 (1.42, 2.34)                 |
|                         |                                  | Taveras, 2008                    | 1.74 (1.35, 2.24)                 |
|                         |                                  | Touchette, 2008                  | 1.69 (1.33, 2.15)                 |
|                         |                                  | Bell_younger, 2010               | 1.76 (1.36, 2.29)                 |
|                         |                                  | Bell_older, 2010                 | 1.86 (1.49, 2.33)                 |
|                         |                                  | Seeger, 2011                     | 1.59 (1.30, 1.93)                 |
|                         |                                  | Silva, 2011                      | 1.72 (1.35, 2.19)                 |
|                         |                                  | Teveras_0.5-2 years, 2014        | 1.82 (1.42, 2.32)                 |
|                         |                                  | Teveras_3-4 years, 2014          | 1.81 (1.42, 2.30)                 |
|                         | Teveras_5-7 years, 2014          | 1.75 (1.36, 2.24)                |                                   |
|                         | ↑ 1 hour/day                     | None                             | <b>0.79 (0.70, 0.89)</b>          |
|                         |                                  | Reilly, 2005                     | 0.76 (0.65, 0.88)                 |
|                         |                                  | Lumeng, 2007                     | 0.80 (0.71, 0.91)                 |
|                         |                                  | Snell, 2007                      | 0.73 (0.61, 0.87)                 |
|                         |                                  | Calamaro, 2010                   | 0.74 (0.63, 0.86)                 |
|                         |                                  | Seeger, 2011                     | 0.83 (0.74, 0.93)                 |
|                         |                                  | Carter, 2011                     | 0.85 (0.76, 0.94)                 |
|                         |                                  | Silva, 2011                      | 0.80 (0.70, 0.91)                 |
|                         |                                  | Teveras_3-4 years, 2014          | 0.77 (0.68, 0.88)                 |
| Teveras_5-7 years, 2014 |                                  | 0.79 (0.69, 0.90)                |                                   |
| <b>Outcome</b>          | <b>Comparison</b>                | <b>Cohort omitted</b>            | <b><math>\beta</math>(95% CI)</b> |
| Annual BMI gain         | Lowest vs. highest               | None                             | <b>0.13 (0.01, 0.25)</b>          |
|                         |                                  | Diethelm, 2010                   | 0.19 (0.03, 0.35)                 |
|                         |                                  | Silva, 2011                      | 0.09 (-0.02, 0.19)                |
|                         |                                  | Lee_1 <sup>st</sup> grader, 2012 | 0.10 (-0.02, 0.23)                |
|                         |                                  | Lee_4 <sup>th</sup> grader, 2012 | 0.19 (0.01, 0.36)                 |
|                         |                                  | O'Dea, 2012                      | 0.10 (-0.02, 0.22)                |
|                         |                                  | ↑ 1 hour/day                     | <b>-0.05 (-0.09, -0.01)</b>       |
|                         | Silva, 2011                      | -0.04(-0.07, -0.01)              |                                   |
|                         | Lee_1 <sup>st</sup> grader, 2012 | -0.04 (-0.08, -0.01)             |                                   |
|                         | Lee_4 <sup>th</sup> grader, 2012 | -0.06 (-0.10, -0.02)             |                                   |
|                         | Lytle_females, 2012              | -0.06 (-0.10, -0.02)             |                                   |
|                         | Lytle_males, 2012                | -0.05 (-0.09, -0.01)             |                                   |
|                         | Mitchell, 2013                   | -0.05 (-0.11, -0.00)             |                                   |

BMI: body mass index; CI: confidence interval; OR: odds ratio.
